# Supplementary material
Source: Springer Nature journal article supplement (https://www.springermedizin.de/resource/supplementary/13054_2009_8418_MOESM2_ESM.pdf/9731916)

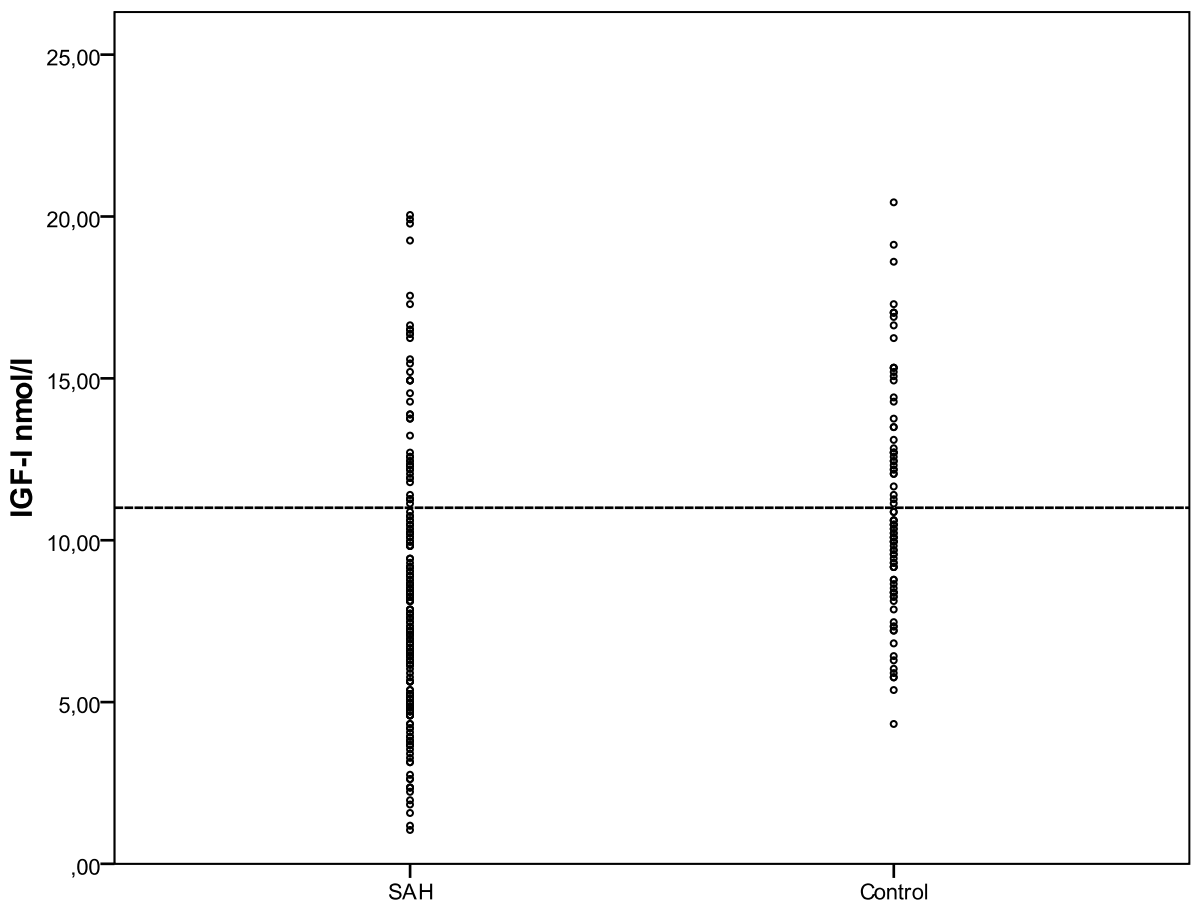

Supplement: MOESM2 [file 9731916]
